# Supplementary material for: Distribution of COVID-19 Morbidity Rate in Association with Social and Economic Factors in Wuhan, China: Implications for Urban Development
Source: MDPI journal article supplement (doi:10.3390/ijerph17103417), 2020-05-14
Supplement: s1 [file s1]

Supplemental material

1. Data sources

Table S1 Data sources

| Dimension             | Variables                                                        | Definitions                                                          | Units                                     | Sources                                                                                                                  |
|-----------------------|------------------------------------------------------------------|----------------------------------------------------------------------|-------------------------------------------|--------------------------------------------------------------------------------------------------------------------------|
|                       | COVID-19 morbidity rate (COV)                                    | The ratio of confirmed cases of COVID-19 to the average population   | %                                         | WeChat official account of the Wuhan government<br>The deadline date of confirmed cases of COVID-19 is February 22, 2020 |
| Built environment     | Population density (POD)                                         | The ratio of the resident population to construction land area       | 10 <sup>4</sup> persons / km <sup>2</sup> | Wuhan Statistical Yearbook (2018)                                                                                        |
|                       | Construction land area proportion (CLP)                          | The ratio of construction land area to land area                     | -                                         | Department of land resources of Hubei province                                                                           |
|                       | Average building scale (ABS)                                     | The ratio of total floor area to the number of residential buildings | m <sup>2</sup>                            | Wuhan Construction Yearbook (2018)                                                                                       |
| Economic activities   | GDP per unit of land area (GPA)                                  | Ratio between gross domestic product and land area                   | 10 <sup>9</sup> Yuan / km <sup>2</sup>    | Wuhan Statistical Yearbook (2018)                                                                                        |
|                       | Value-added of tertiary industry per unit of land area (VTA)     | Ratio between value-added of tertiary industry and land area         | 10 <sup>9</sup> Yuan / km <sup>2</sup>    | Wuhan Statistical Yearbook (2018)                                                                                        |
|                       | Total retail sales of consumer goods per unit of land area (TRA) | Ratio between total retail sales of consumer goods and land area     | 10 <sup>9</sup> Yuan / km <sup>2</sup>    | Wuhan Statistical Yearbook (2018)                                                                                        |
| Public service status | Public green space density (PGD)                                 | Per capita public green space                                        | m <sup>2</sup> / person                   | Wuhan Construction Yearbook (2017)                                                                                       |
|                       | Hospital density (HOD)                                           | The ratio of number of hospitals to land area                        | person / km <sup>2</sup>                  | Wuhan Health Yearbook (2018)                                                                                             |
|                       | Aged population density (APD)                                    | The ratio of population aged 65 and over to the land area            | person / km <sup>2</sup>                  | Wuhan Health Yearbook (2018)                                                                                             |

## 2. Units of analysis

Administrative divisions that refer to 13 districts in Wuhan are applied in the spatial regression analysis in this study.

Table S2 Units of analysis

| <b>District</b>                                  | <b>Confirmed case<br/>(person)</b> | <b>Average population<br/>(10<sup>4</sup> person)</b> | <b>Area<br/>(km<sup>2</sup>)</b> |
|--------------------------------------------------|------------------------------------|-------------------------------------------------------|----------------------------------|
| Jiang'an District                                | 4117                               | 85.21                                                 | 64.24                            |
| Jianghan District                                | 7099                               | 61.29                                                 | 33.43                            |
| Qiaokou District                                 | 6500                               | 69.86                                                 | 46.39                            |
| Hanyang District                                 | 3172                               | 55.68                                                 | 108.34                           |
| Wuchang District                                 | 7873                               | 116.02                                                | 87.42                            |
| Qingshan District                                | 2815                               | 47.75                                                 | 68.40                            |
| Hongshan District                                | 4648                               | 135.55                                                | 480.20                           |
| Dongxihu District                                | 2523                               | 43.77                                                 | 439.19                           |
| Wuhan development zone including Hannan District | 1470                               | 43.44                                                 | 489.70                           |
| Caidian District                                 | 1854                               | 37.39                                                 | 906.10                           |
| Jiangxia District                                | 1465                               | 76.26                                                 | 2010.00                          |
| Huangpi District                                 | 1669                               | 106.08                                                | 2261.00                          |
| Xinzhou District                                 | 996                                | 93.17                                                 | 1500.00                          |

### 3. Software

Pearson correlation analysis was performed in SPSS. And the graphs of Pearson correlation analysis were mapped in SigmaPlot.

Geoda was selected to analyze spatial regression in this study. The spatial correlation test for the COVID-19 morbidity rate was also performed in Geoda.
